# Supplementary material for: Identification of a functional variant in the KIF5A-CYP27B1-METTL1-FAM119B locus associated with multiple sclerosis
Source: PubMed Central journal article supplement — J Med Genet. 2012 Nov 17;50(1):25–33. doi: 10.1136/jmedgenet-2012-101085 (PMC3538279; doi:10.1136/jmedgenet-2012-101085), 2012-11-17
Supplement: jmedgenet-2012-101085-s1.pdf [file jmedgenet-2012-101085-s1.pdf]

## Supplementary table 1

MS study cohort

|                               | Case          | Controls      |
|-------------------------------|---------------|---------------|
| <b>Gender (n)</b>             |               |               |
| Female                        | 1900          | 1929          |
| Male                          | 926           | 904           |
| No details                    | 50            | 77            |
| Female to male ratio          | 2.1           | 2.1           |
| <b>Age (years)</b>            |               |               |
| Age at onset                  |               |               |
| Mean $\pm$ SD                 | 30 $\pm$ 9.7  |               |
| Range                         | 6-68          |               |
| <b>Age at analysis</b>        |               |               |
| Mean $\pm$ SD                 | 36 $\pm$ 12.3 | 38 $\pm$ 12.3 |
| Range                         | 13-85         | 10-90         |
| <b>Disease course no. (%)</b> |               |               |
| RR                            | 2047 (75.2)   |               |
| SP                            | 472 (17.3)    |               |
| PP                            | 158 (5.8)     |               |
| PR                            | 13 (0.4)      |               |
| CIS                           | 32 (1)        |               |
| No details                    | 154           |               |

Abbreviations: RR, relapsing-remitting; SP, secondary-progressive; PP, primary-progressive; PR, progressive-relapsing; CIS, clinically isolated syndrome.

## Supplementary table 2

Coordinates and oligonucleotides used for PCR amplification of the clones assayed for allele-specific regulatory sequences.

| Fragment | Coordinates (NCBI36/hg18) | Size | Primers                                                      |
|----------|---------------------------|------|--------------------------------------------------------------|
| I        | 56432826-56433210         | 383  | Forward GGAGTTGGGGTACCAGAGGT<br>Reverse GGCCTCAGGTCTTTGCATTA |
| II       | 56444040-56444493         | 453  | Forward GGTCAAGGGGAGTGTTTGAA<br>Reverse CTACCCCTCAGCCACTGTTC |
| III      | 56451121-56451516         | 395  | Forward CAAAAGAGGGCCTGAGTGT<br>Reverse GGCCTCATGATGGTCCTATG  |
| IV       | 56451404-56453283         | 1879 | Forward AAAGGGAGGAGGGTTTCTCA<br>Reverse AGACTGGGCCCAAAGTTCTC |
| V        | 56462202-56463817         | 1615 | Forward GCCTCTTCCTGAGCCTCTT<br>Reverse AAATAAAATAGCCGGGTGTCG |
| VI       | 56464042-56465447         | 1405 | Forward ATTCTGAGAAATGGCGTCGT<br>Reverse AGGAGATGACAGGTCCATGC |

**Supplementary table 3.**

SNP captured by the Tag-SNP assay

| Test                 | Alleles Captured                                                                                                                                                                                                                                                                                                                    |
|----------------------|-------------------------------------------------------------------------------------------------------------------------------------------------------------------------------------------------------------------------------------------------------------------------------------------------------------------------------------|
| <b>rs1678542(1)</b>  | rs11172254,rs10783832,rs775322,rs1284464,<br>rs11172247,rs1678542                                                                                                                                                                                                                                                                   |
| rs2888334            | rs2888334,rs10876994,rs2306390,rs775251                                                                                                                                                                                                                                                                                             |
| rs775249             | rs775249,rs775250,rs775246                                                                                                                                                                                                                                                                                                          |
| rs1678536            | rs1678536                                                                                                                                                                                                                                                                                                                           |
| rs7313599            | rs7313599                                                                                                                                                                                                                                                                                                                           |
| rs1078109            | rs1078109                                                                                                                                                                                                                                                                                                                           |
| rs7305391            | rs7305391,rs8873,rs1545783,rs812315                                                                                                                                                                                                                                                                                                 |
| rs1564374            | rs1564374,rs2277324                                                                                                                                                                                                                                                                                                                 |
| rs11172290           | rs2277323,rs12320537,rs11172290,rs774897,rs12322482,<br>rs715930,rs774899                                                                                                                                                                                                                                                           |
| rs3825078            | rs3825078,rs1082502,rs10877001,rs810204,<br>rs1678504,rs1871417,rs2640629,rs774890,rs1678516,<br>rs1678540,rs10877008,rs10783844,rs7314152,rs4760168,<br>rs1678514,rs2640631,rs2277322,rs1678520,rs7979246,rs2640637,<br>rs1689595,rs1628552,rs7976852,rs1689585,rs1689592,rs774887,<br>rs10083154,rs1629032, <b>rs10876993 (2)</b> |
| rs701006             | rs701006                                                                                                                                                                                                                                                                                                                            |
| rs2301551            | rs2301551                                                                                                                                                                                                                                                                                                                           |
| rs12307841           | rs12307841,rs4760169                                                                                                                                                                                                                                                                                                                |
| <b>rs12368653(3)</b> | rs12368653                                                                                                                                                                                                                                                                                                                          |
| rs1048691            | rs1048691                                                                                                                                                                                                                                                                                                                           |
| rs6581155            | rs6581155,rs10747783,rs923829,rs10431552,rs2072052,<br>rs2291617,rs4646536,rs724834,rs2069502,rs10877013,<br>rs10877011,rs701008,rs8181644,rs10877019,rs11172335,<br><b>rs703842(4)</b> ,rs10877015,rs11172333                                                                                                                      |

Bold indicate the SNPs reported to be associated in this region to different diseases by GWAS

- (1) Variant reported associated with RA by Raychaudhuri S et al. [13]
- (2) Variant reported associated with RA and CD by Zhernakova A et al..[14] The LD between rs10876993 and rs3825078 is  $r^2=0.95$
- (3) Variant reported associated with MS by Sawcer S et al. [8]
- (4) Variant reported associated with MS by ANZgene.[12] The LD between rs6581155 and rs703842 is  $r^2=1$ .
